# Supplementary material for: WNT signaling modulates PD-L1 expression in the stem cell compartment of triple-negative breast cancer
Source: PubMed Central journal article supplement (PMC6755989; doi:10.1038/s41388-019-0700-2), 2019-01-31

# Supplementary Figure S7

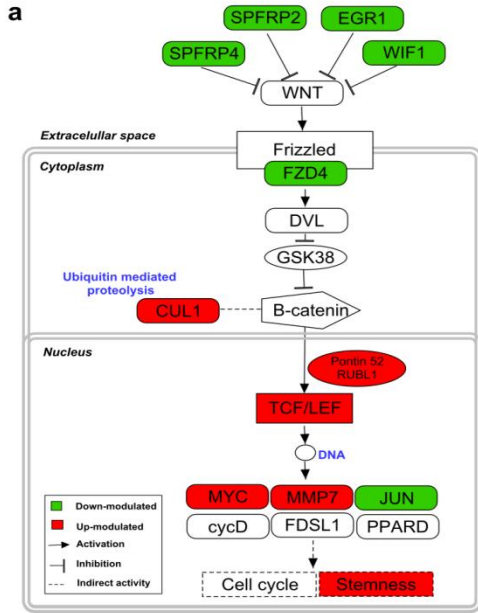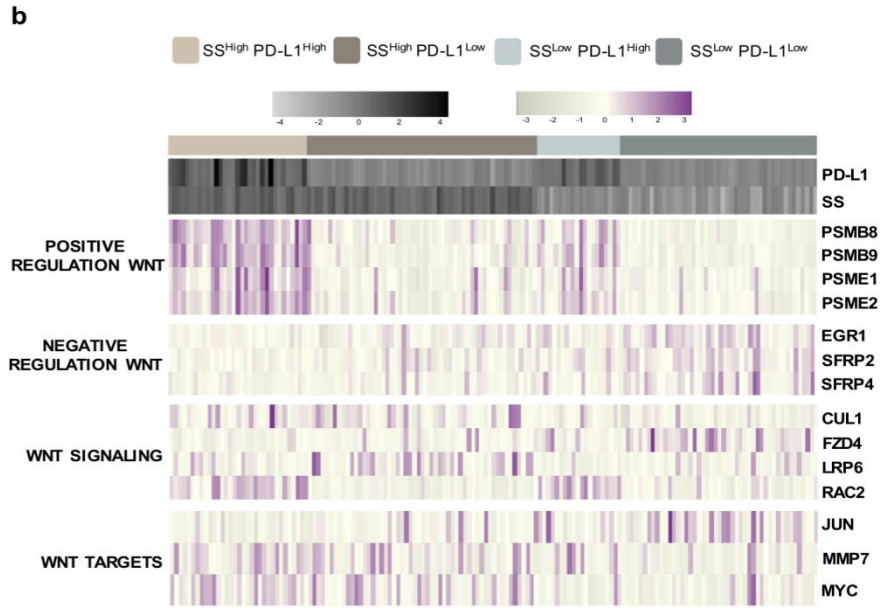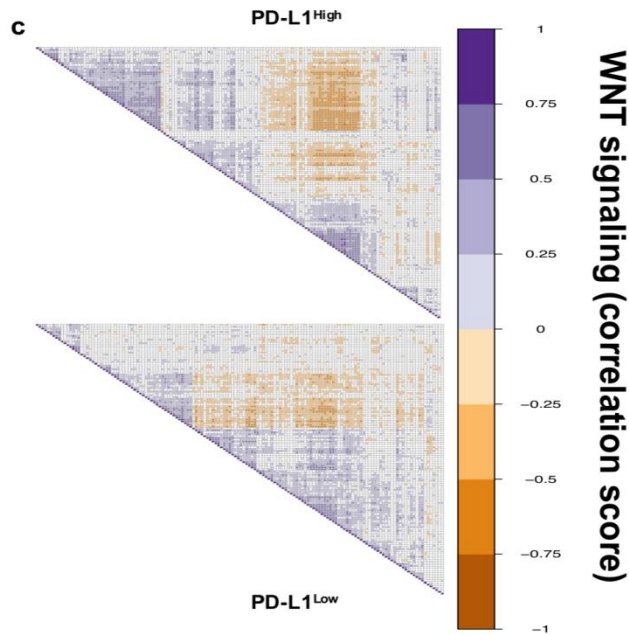

Supplement: 41388_2019_700_MOESM7_ESM.pdf [file 41388_2019_700_MOESM7_ESM.pdf]
