# Supplementary material for: WNT signaling modulates PD-L1 expression in the stem cell compartment of triple-negative breast cancer
Source: PubMed Central journal article supplement (PMC6755989; doi:10.1038/s41388-019-0700-2), 2019-01-31
Supplement: 41388_2019_700_MOESM12_ESM.pdf [file 41388_2019_700_MOESM12_ESM.pdf]

# Supplementary Figure S12

MDAMB231

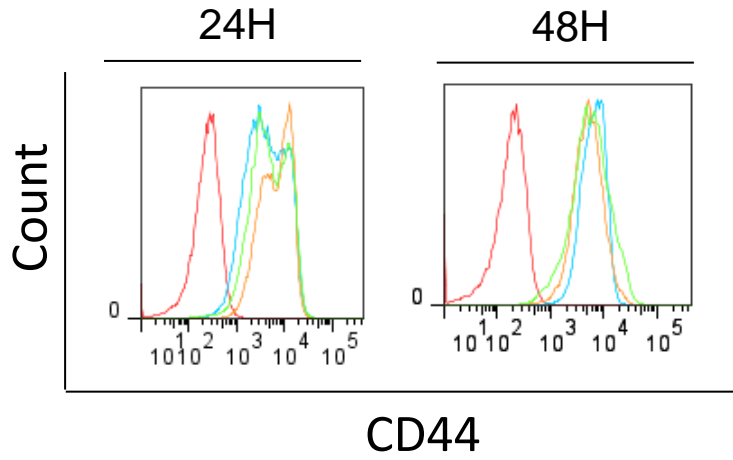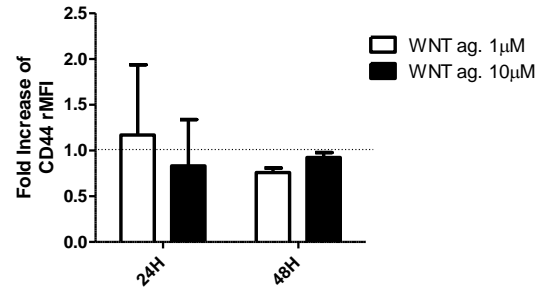

SUM149

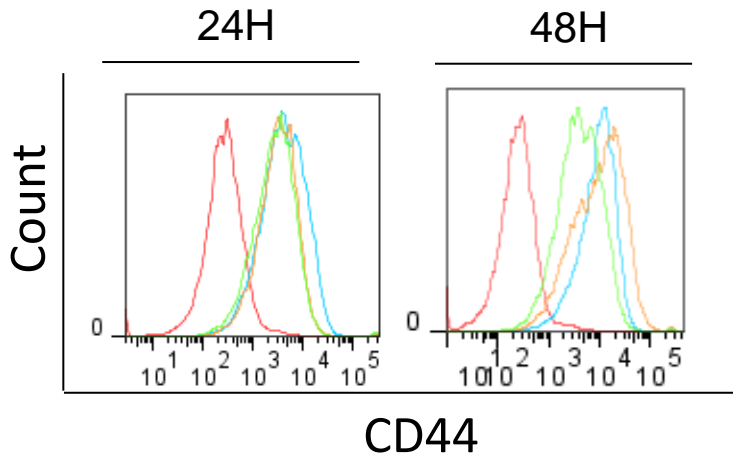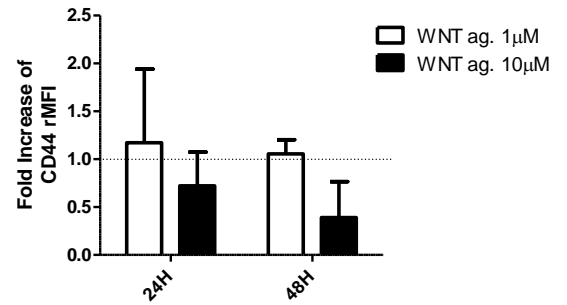

SUM159

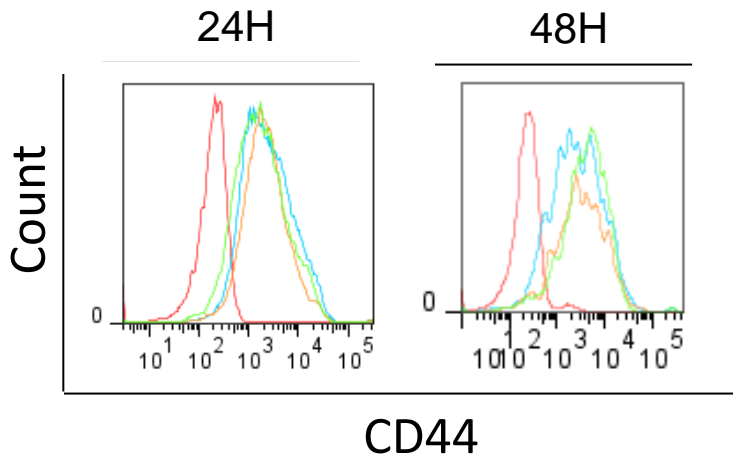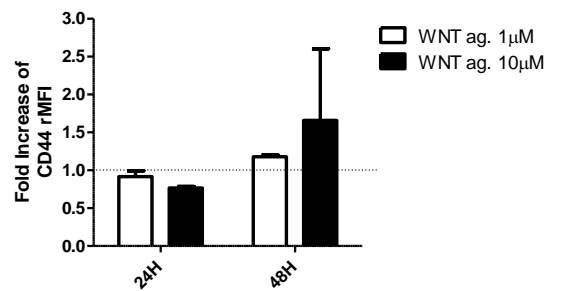

— Ctrl Iso — DMSO — WNT ag. 1µM — WNT ag. 10µM
