# Supplementary material for: WNT signaling modulates PD-L1 expression in the stem cell compartment of triple-negative breast cancer
Source: PubMed Central journal article supplement (PMC6755989; doi:10.1038/s41388-019-0700-2), 2019-01-31
Supplement: 41388_2019_700_MOESM14_ESM.pdf [file 41388_2019_700_MOESM14_ESM.pdf]

MDAMB231

24h

48h

Count

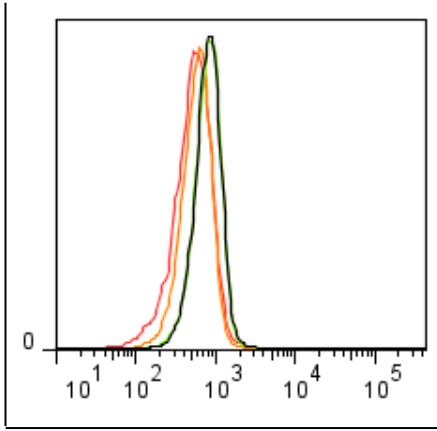

Count

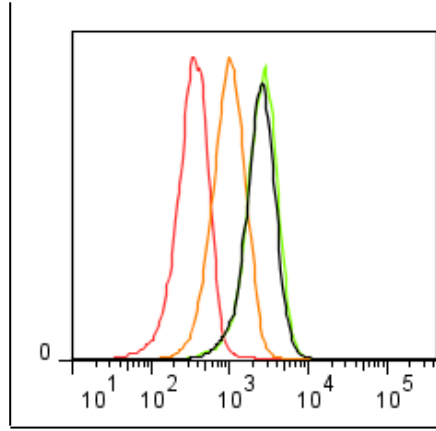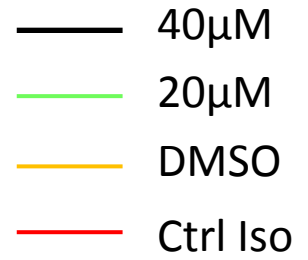

PD-L1

PD-L1

**b**

SUM149

24h

48h

Count

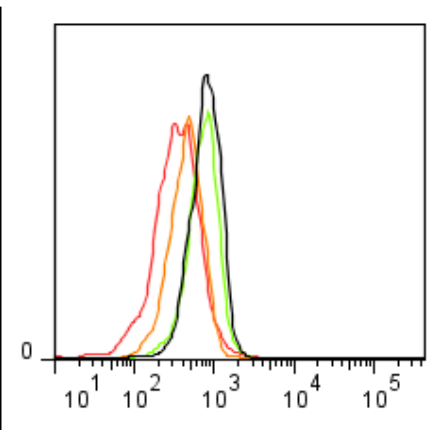

Count

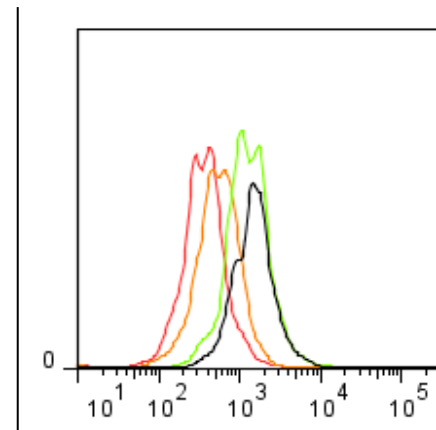

PD-L1

PD-L1

**c**

SUM159

Count

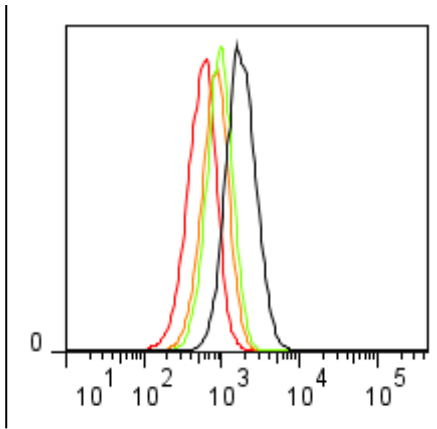

Count

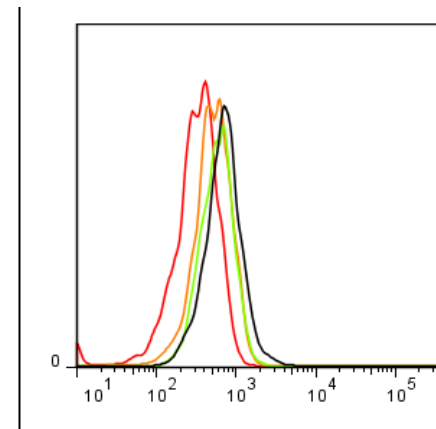

PD-L1

PD-L1
